# Supplementary material
Source: publisher site journal article supplement (https://www.spandidos-publications.com/5913/downloadSupplementary)

Figure S1. Effects of varying concentrations of A $\beta_{25-35}$  and NGR1 on viability in PC12 cells. (A) Viability of PC12 cells treated with 5, 10, 15, 20 and 30  $\mu$ M A $\beta_{25-35}$  for 24 h as examined using an MTT assay. n=4-6. (B) Viability of PC12 cells treated with 50, 100, 250, 500, 1,000, 1,500 and 2,000  $\mu$ g/ml NGR1 for 24 h as examined using an MTT assay. n=6. Data are presented as the mean  $\pm$  SEM. \*P<0.05, \*\*P<0.01 vs. untreated control group. A $\beta_{25-35}$ , amyloid- $\beta$ -protein fragment 25-35; NGR1, notoginsenoside R1.

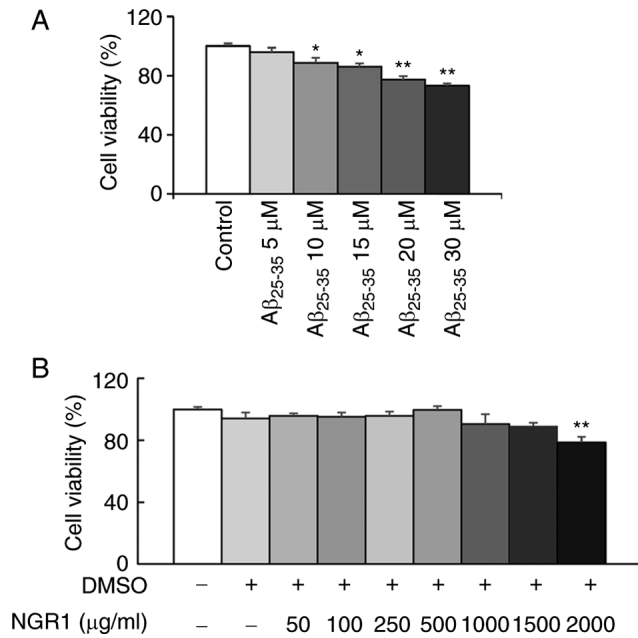

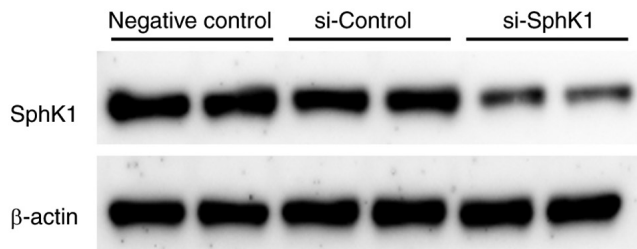

Supplement: Supplementary file 1 [file downloadSupplementary]
